# Supplementary material for: A biotin-guided hydrogen sulfide fluorescent probe and its application in living cell imaging
Source: Royal Society of Chemistry journal article supplement (doi:10.1039/d0ra06524b), 2020-01-01
Supplement: d0ra06524b1.pdf [file d0ra06524b1.pdf]

## **A Biotin-Guided Hydrogen Sulfide Fluorescent Probe and Its Application in Living Cell Imaging**

Chen Zhang,<sup>‡a</sup> Jiewen Zhang,<sup>‡a</sup> Zhiqiang Xu,<sup>b</sup> Kun Zang,<sup>a</sup> Feng Liu,<sup>a</sup> Jun Yin,<sup>\*b</sup> Ying Tan<sup>\*a</sup> and  
Yuyang Jiang<sup>c</sup>

<sup>a</sup>State Key Laboratory of Chemical Oncogenomics, Key Laboratory of Chemical Biology, Tsinghua Shenzhen International Graduate School, Tsinghua University, Shenzhen, 518055, P. R. China. Email: tan.ying@il.ccnu.edu.cn

<sup>b</sup>Key Laboratory of Pesticide and Chemical Biology, Ministry of Education, College of Chemistry, Central China Normal University, Wuhan 430079, China. Email: yinj@mail.ccnu.edu.cn

<sup>c</sup>School of Pharmaceutical Sciences, Tsinghua University, Beijing 100084, P. R. China.

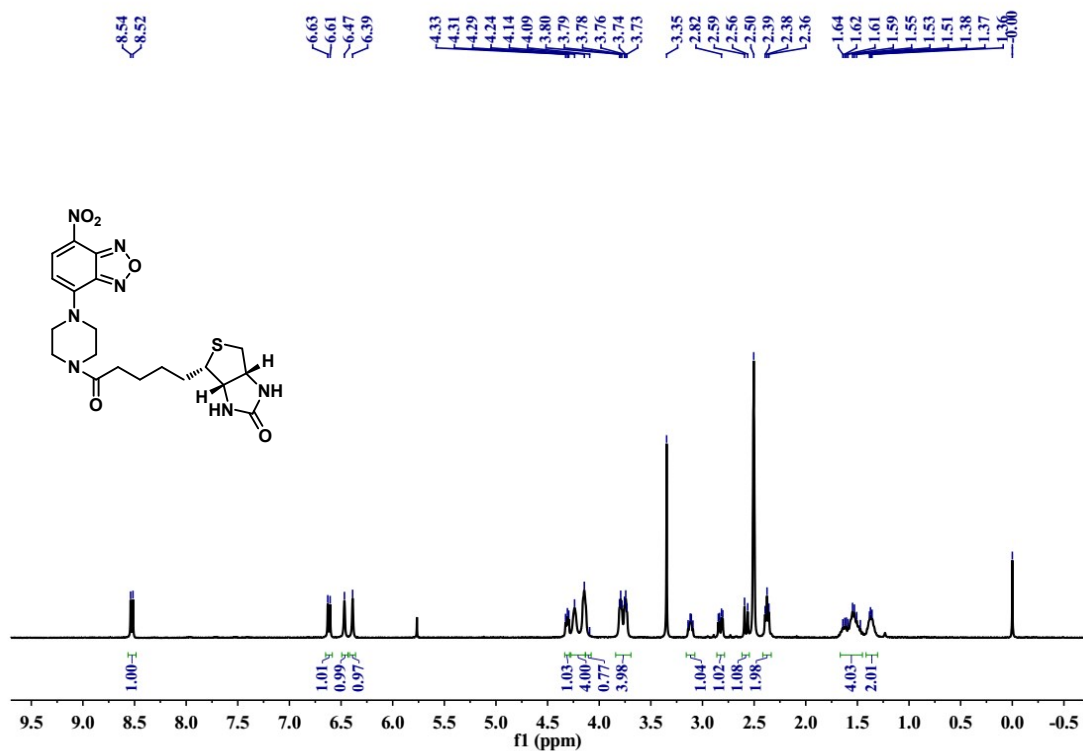

Fig. S1 <sup>1</sup>H NMR spectrum (DMSO-*d*<sub>6</sub>) of NP-Biotin

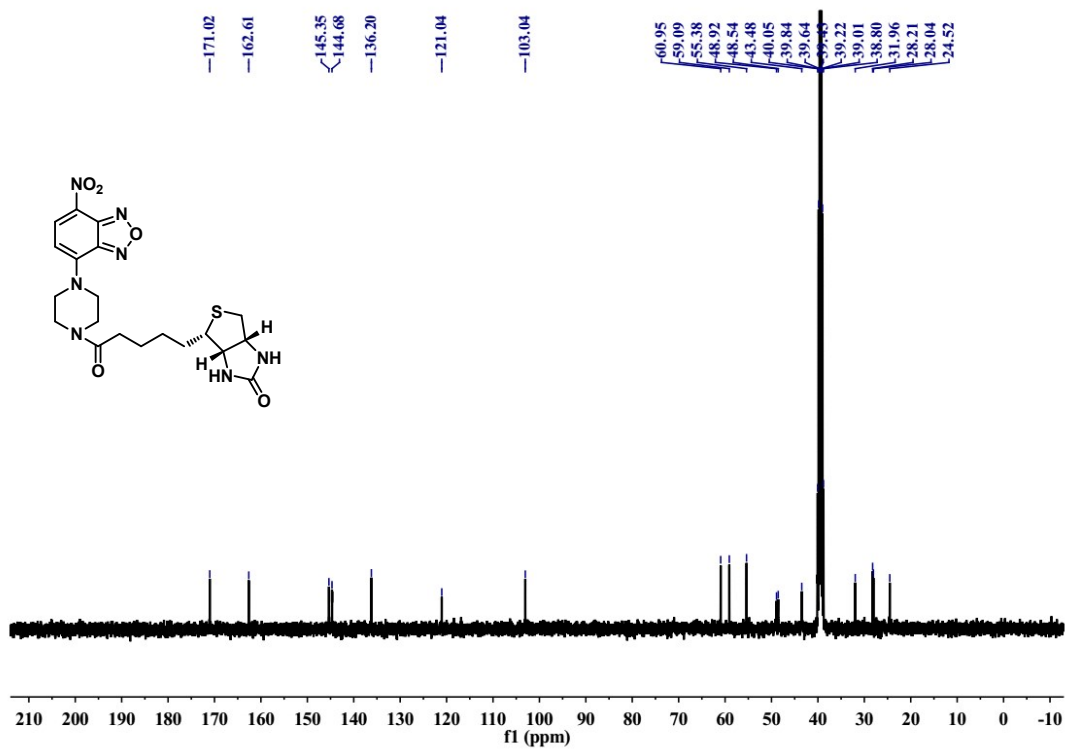

Fig. S2 <sup>13</sup>C NMR spectrum (DMSO-*d*<sub>6</sub>) of NP-Biotin



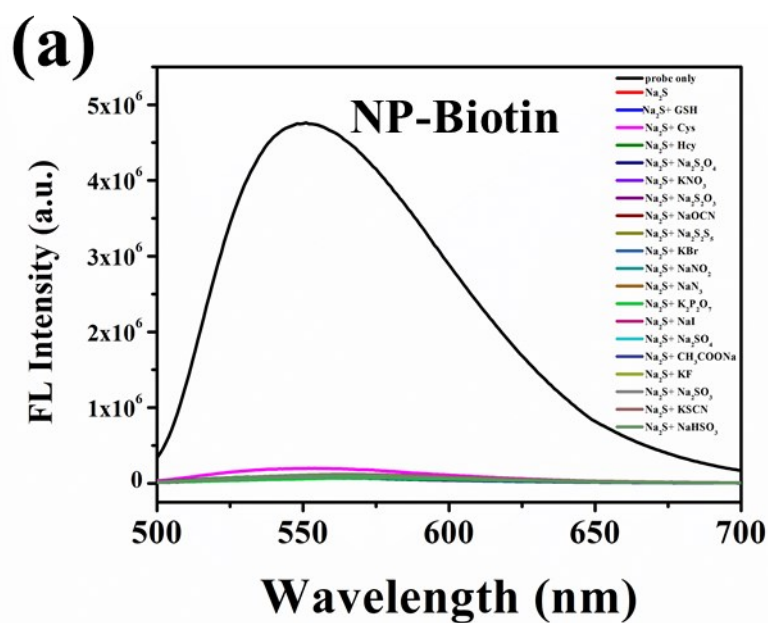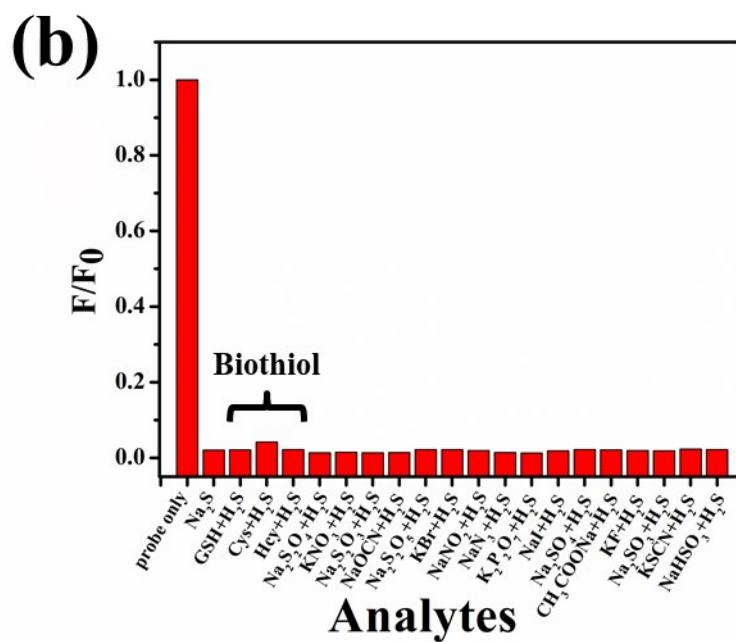

Fig. S3 Fluorescence spectra (a) and  $F/F_0$  at 550 nm (b) of 10  $\mu\text{M}$  NP-Biotin with  $\text{Na}_2\text{S}$  in the presence of various species (GSH, Cys, Hcy,  $\text{Na}_2\text{S}_2\text{O}_4$ ,  $\text{KNO}_3$ ,  $\text{Na}_2\text{S}_2\text{O}_3$ , NaOCN,  $\text{Na}_2\text{S}_2\text{O}_5$ , KBr,  $\text{NaNO}_2$ ,  $\text{NaN}_3$ ,  $\text{K}_2\text{P}_2\text{O}_7$ , NaI,  $\text{Na}_2\text{SO}_4$ ,  $\text{CH}_3\text{COONa}$ , KF,  $\text{Na}_2\text{SO}_3$ , KSCN and  $\text{NaHSO}_3$ ) under excitation at 480 nm. ( $F_0$  represents the fluorescence intensity of NP-Biotin and  $F$  represents the fluorescence intensity of NP-Biotin with  $\text{Na}_2\text{S}$  in the presence of other guests respectively).

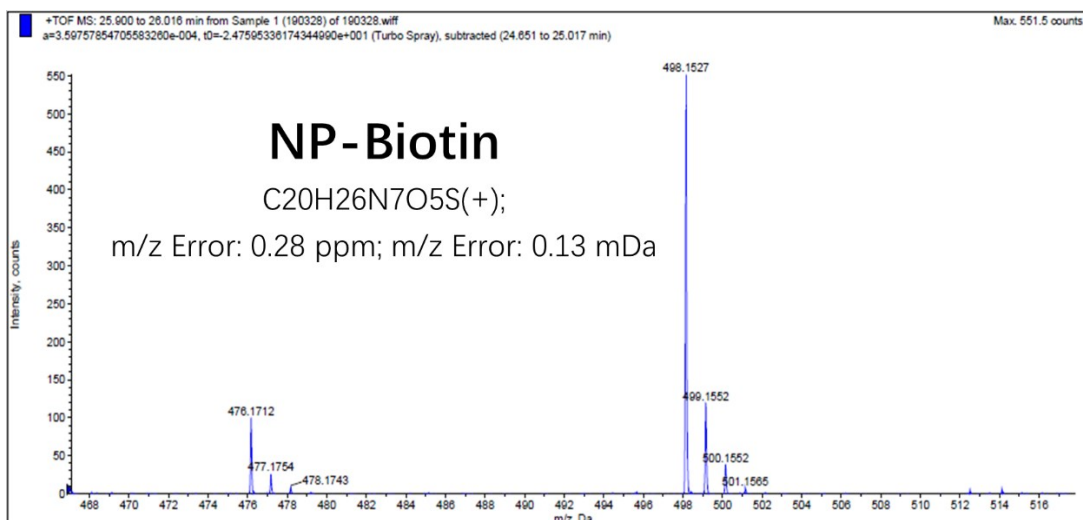

Fig. S4 HRMS study of NP-Biotin (100 $\mu$ M) in MeOH at room temperature

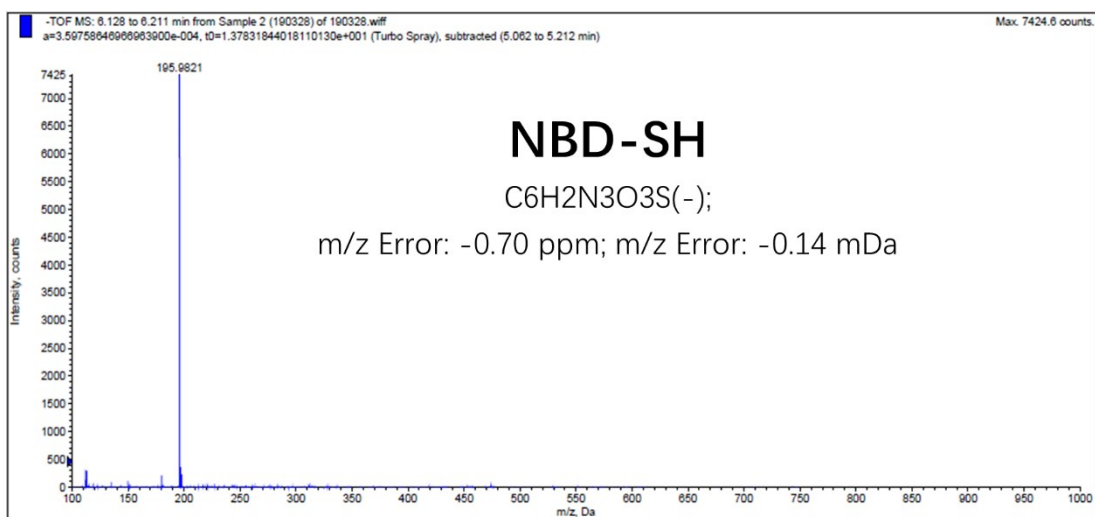

Fig. S5 HRMS study of the product of NP-Biotin (100 $\mu$ M) with Na<sub>2</sub>S (1 mM) in MeOH at room temperature.

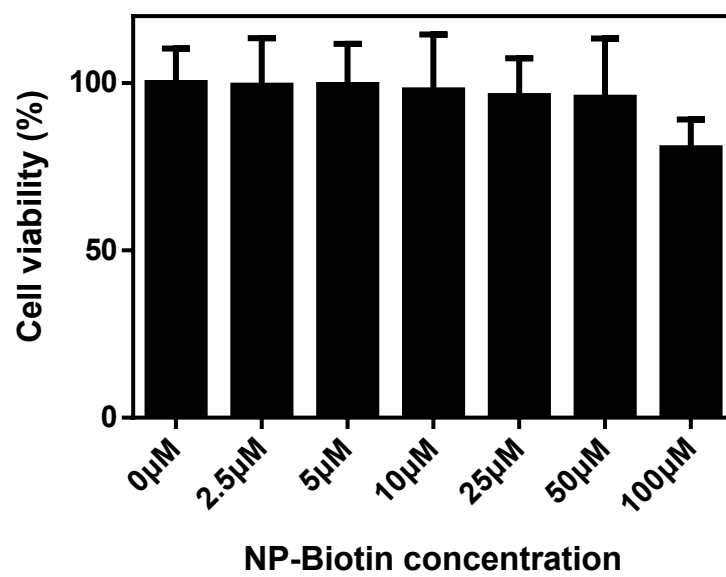

Fig. S6 Cytotoxicity of NP-Biotin towards HepG2. The cell viability was measured by CCK-8 assay.

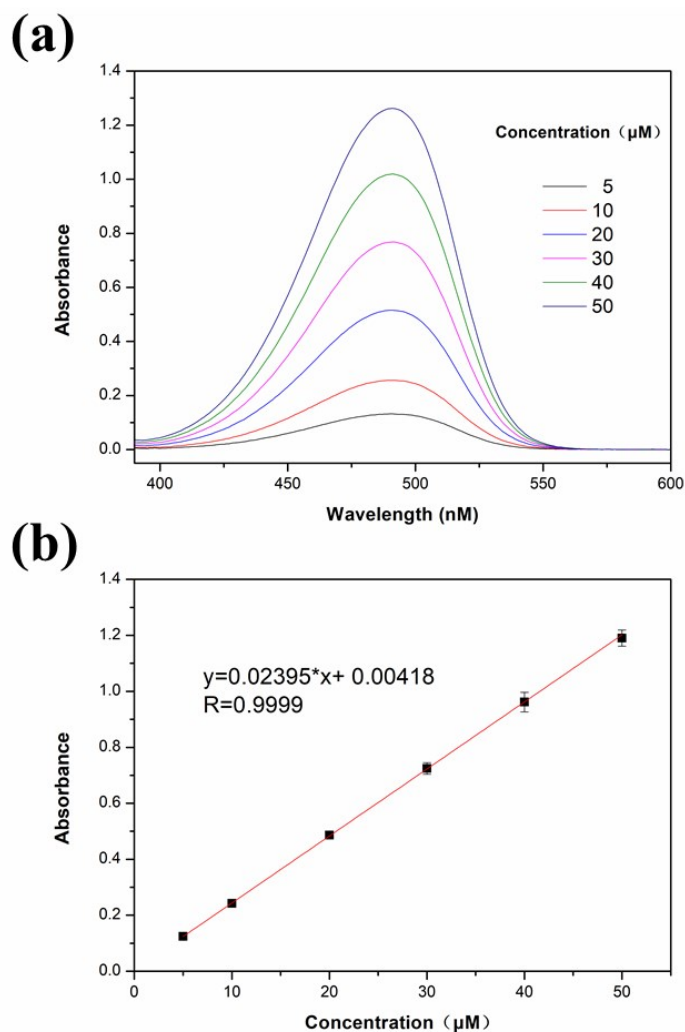

Fig. S7 (a) Fluorescence spectra of NP-Biotin at different concentrations in dimethyl sulfoxide(DMSO); (b) The linear relationship between absorbance and the NP-Biotin concentration. NP-Biotin showed maximal absorption at 490 nm ( $\epsilon=2.395 \times 10^4 L / (mol \text{ cm})$ ).

Optical properties of NP-biotin was examined in DMSO on a Cary Eclipse spectrophotometer and Fluorolog fluorescence spectrophotometer. For determination of the quantum efficiency ( $\Phi_f$ ) of fluorescence, Rhodamine 6G ( $\Phi=0.95$  in ethyl alcohol) was used as standards and the  $\Phi_f$  value was calculated according to Equation (1)

$$\Phi_x / \Phi_{st} = [A_{st} / A_x][n_x^2 / n_{st}^2][D_x / D_{st}] \quad (1)$$

Where st refers to the standard, x refers to the sample, A is the absorbance at the excitation wavelength, and n is the refractive index.

We calculated that the fluorescence quantum yield of NP-Biotin was 0.05 in the absence of hydrogen sulfide.

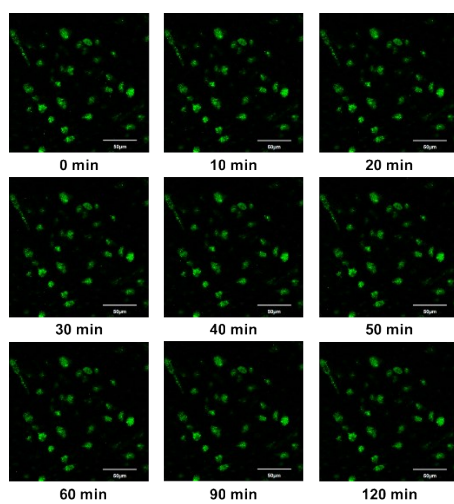

Fig. S8 Photobleaching of LO2 cells after NP-Biotin labeling. LO2 cells were imaged from 0 minute to 120 minutes after incubation with 10  $\mu$ M NP-Biotin for 1 h and washing by PBS.
